# Supplementary material for: Anxiolytic effects of NLRP3 inflammasome inhibition in a model of chronic sleep deprivation
Source: PubMed Central journal article supplement (PMC7809257; doi:10.1038/s41398-020-01189-3), 2021-01-14
Supplement: 41398_2020_1189_MOESM2_ESM.pdf [file 41398_2020_1189_MOESM2_ESM.pdf]

| Dark-Light-Box and Elevated Plus Maze | WT NSD + Veh |              |              | WT NSD + FDP |              |              | WT SD + Veh  |              |              | WT SD + FDP  |              |              | P (Repeated measure ANOVA) |              |             |              |                  |              |
|---------------------------------------|--------------|--------------|--------------|--------------|--------------|--------------|--------------|--------------|--------------|--------------|--------------|--------------|----------------------------|--------------|-------------|--------------|------------------|--------------|
|                                       | Week 1       | Week 2       | Week 3       | Week 1       | Week 2       | Week 3       | Week 1       | Week 2       | Week 3       | Week 1       | Week 2       | Week 3       | Treatment Effect           |              | Time Effect |              | Treatment x Time |              |
|                                       | P            | F (DFn, DFd) | P            | F (DFn, DFd) | P            | F (DFn, DFd) | P            | F (DFn, DFd) | P            | F (DFn, DFd) | P            | F (DFn, DFd) | P                          | F (DFn, DFd) | P           | F (DFn, DFd) | P                | F (DFn, DFd) |
| Body Weight (g)                       | 29.22 ± 0.98 | 29.99 ± 1.21 | 31.10 ± 1.41 | 27.07 ± 0.82 | 27.16 ± 0.82 | 28.12 ± 0.62 | 31.26 ± 0.77 | 31.34 ± 0.84 | 31.81 ± 1.26 | 27.66 ± 0.88 | 28.20 ± 0.93 | 27.80 ± 1.37 | 0.003                      | 5.68         | 0.10        | 2.36         | 0.80             | 0.51         |
| Body Weight Change (g)                | N/A          | 0.77 ± 0.49  | 1.11 ± 0.86  | N/A          | 0.18 ± 0.68  | 0.93 ± 0.62  | N/A          | 0.06 ± 1.32  | 0.47 ± 1.37  | N/A          | 0.54 ± 0.27  | -0.40 ± 0.85 | 0.49                       | 0.82         | 0.84        | 0.04         | 0.85             | 0.27         |
| Diet Consumption (g/day)              | 3.03 ± 0.82  | 2.96 ± 0.69  | 4.19 ± 0.53  | 2.68 ± 0.37  | 2.72 ± 0.14  | 2.97 ± 0.20  | 3.11 ± 0.52  | 2.97 ± 0.41  | 2.53 ± 0.70  | 2.72 ± 0.67  | 2.75 ± 0.83  | 2.41 ± 0.70  | 0.65                       | 0.59         | 0.67        | 0.25         | 0.31             | 1.38         |
| Liquid Consumption (mL/day)           | 3.90 ± 1.27  | 3.51 ± 0.96  | 4.28 ± 1.81  | 3.99 ± 0.19  | 4.50 ± 0.49  | 3.94 ± 0.72  | 3.27 ± 0.68  | 3.40 ± 0.13  | 3.13 ± 0.63  | 5.42 ± 1.68  | 5.68 ± 2.45  | 2.83 ± 0.93  | 0.79                       | 0.36         | 0.26        | 1.643        | 0.18             | 1.86         |

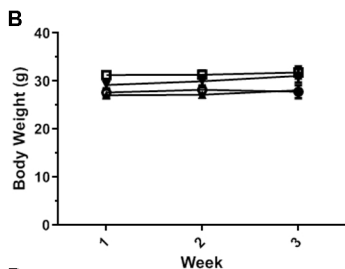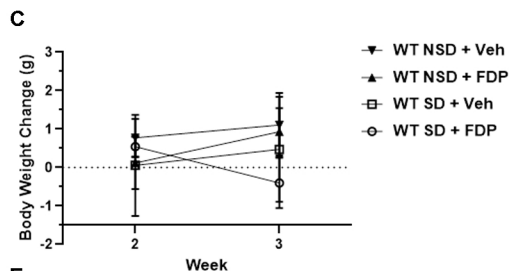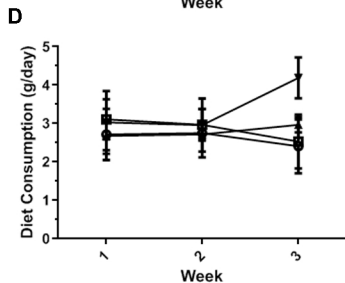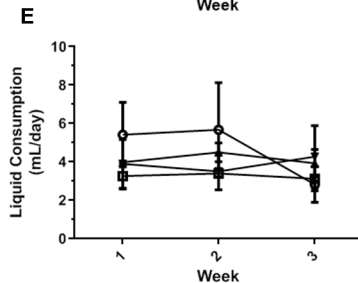

Supplemental Figure S1: Physiological Monitoring Data
