# Supplementary material for: Anxiolytic effects of NLRP3 inflammasome inhibition in a model of chronic sleep deprivation
Source: PubMed Central journal article supplement (PMC7809257; doi:10.1038/s41398-020-01189-3), 2021-01-14

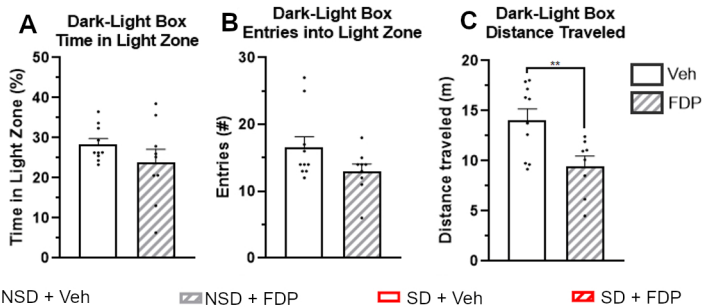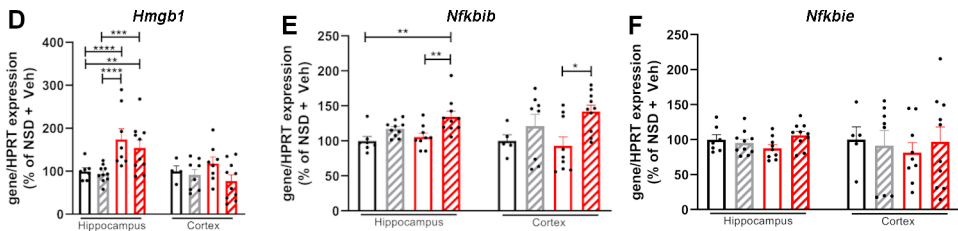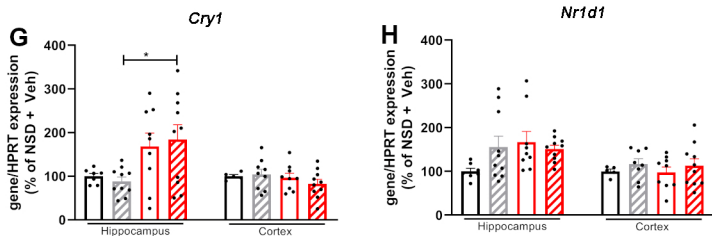

Supplement: 41398_2020_1189_MOESM3_ESM.pdf [file 41398_2020_1189_MOESM3_ESM.pdf]
