# Supplementary material for: Anxiolytic effects of NLRP3 inflammasome inhibition in a model of chronic sleep deprivation
Source: PubMed Central journal article supplement (PMC7809257; doi:10.1038/s41398-020-01189-3), 2021-01-14
Supplement: 41398_2020_1189_MOESM5_ESM.pdf [file 41398_2020_1189_MOESM5_ESM.pdf]

**A**

| Dark-Light-Box and Elevated Plus Maze | WT + Veh     |              |              | WT + FDP     |              |              | <i>Bmal1</i> <sup>+/+</sup> + Veh |              |              | <i>Bmal1</i> <sup>+/+</sup> + FDP |              |              | <i>P</i> (Repeated measure ANOVA) |              |             |              |                  |              |
|---------------------------------------|--------------|--------------|--------------|--------------|--------------|--------------|-----------------------------------|--------------|--------------|-----------------------------------|--------------|--------------|-----------------------------------|--------------|-------------|--------------|------------------|--------------|
|                                       | Week 1       | Week 2       | Week 3       | Week 1       | Week 2       | Week 3       | Week 1                            | Week 2       | Week 3       | Week 1                            | Week 2       | Week 3       | Treatment Effect                  |              | Time Effect |              | Treatment x Time |              |
|                                       |              |              |              |              |              |              |                                   |              |              |                                   |              |              | <i>P</i>                          | F (Dfn, Dfd) | <i>P</i>    | F (Dfn, Dfd) | <i>P</i>         | F (Dfn, Dfd) |
| Body Weight (g)                       | 29.22 ± 0.98 | 29.99 ± 1.21 | 31.10 ± 1.41 | 27.07 ± 0.62 | 27.18 ± 0.62 | 28.12 ± 0.62 | 24.30 ± 1.57                      | 24.29 ± 1.24 | 24.85 ± 1.13 | 20.92 ± 0.89                      | 22.95 ± 0.90 | 22.93 ± 0.87 | <0.0001                           | 13.80        | 0.0008      | 8.74         | 0.34             | 1.16         |
| Body Weight Change (g)                | N/A          | 0.77 ± 0.49  | 1.11 ± 0.84  | N/A          | 0.12 ± 0.68  | 0.93 ± 0.62  | N/A                               | -0.01 ± 0.35 | 0.57 ± 0.30  | N/A                               | 2.03 ± 0.23  | -0.02 ± 0.48 | 0.24                              | 1.48         | 0.90        | 0.01         | 0.41             | 1.00         |
| Diet Consumption (g/day)              | 3.03 ± 0.82  | 2.96 ± 0.89  | 4.19 ± 0.53  | 2.68 ± 0.37  | 2.72 ± 0.14  | 2.97 ± 0.20  | 2.64 ± 0.33                       | 2.32 ± 0.01  | 2.86 ± 0.76  | 2.13 ± 0.30                       | 2.17 ± 0.03  | 1.71 ± 0.06  | 0.06                              | 4.69         | 0.36        | 1.06         | 0.53             | 0.90         |
| Liquid Consumption (mL/day)           | 3.90 ± 1.27  | 3.51 ± 0.96  | 4.28 ± 1.61  | 3.99 ± 0.19  | 4.50 ± 0.49  | 3.94 ± 0.72  | 4.68 ± 2.52                       | 2.67 ± 0.17  | 2.60 ± 0.02  | 2.54 ± 0.08                       | 4.22 ± 1.33  | 2.67 ± 0.08  | 0.71                              | 0.48         | 0.75        | 0.28         | 0.45             | 1.04         |

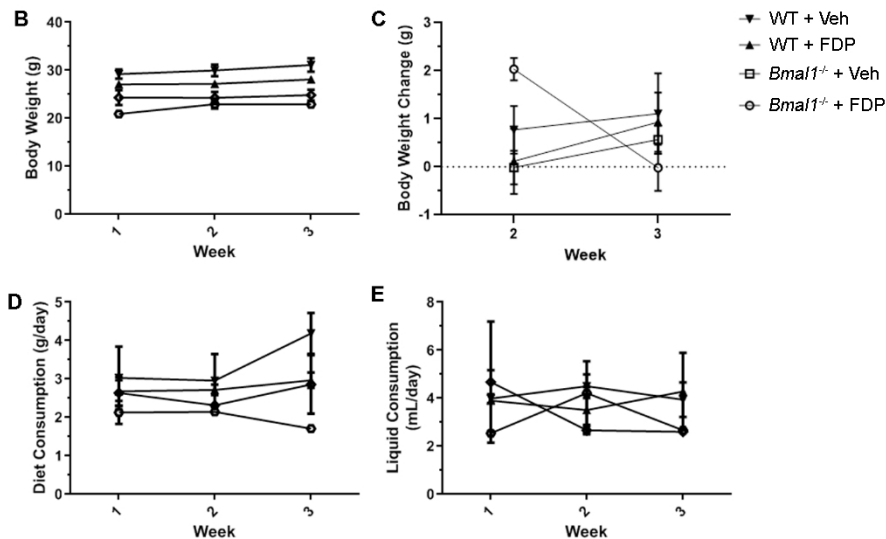

Supplementary Figure S4: Physiological monitoring data.
